# Supplementary material for: cGAS/STING and innate brain inflammation following acute high-fat feeding
Source: Front Immunol. 2022 Sep 29;13:1012594. doi: 10.3389/fimmu.2022.1012594 (PMC9556783; doi:10.3389/fimmu.2022.1012594)
Supplement: Supplementary file 11 [file Table_1.xlsx]

## Sheet: Sheet1
Parameter	Results section	Statistical test	Statistical software
Glucose tolerance test (individual time points)	3.1 (Fig 1B)	One way ANOVA	GraphPad Prism (9.0.0)
Glucose tolerance test (area under the curve)	3.1 (Fig 1C)	Unpaired t test	GraphPad Prism (9.0.0)
Cortex insulin signaling protein concentrations	3.1 (Fig 1D, E; supplemental Fig S1A, S1B)	Mixed Model (Proc Mixed)	SAS 9.4
Behaivor (puzzle box)	3.1 (supplemental Fig S2)	2way ANOVA	GraphPad Prism (9.0.0)
Plasma immunophenotyping (Flow cytometery)	3.2 (supplemental Fig 3)	Mixed Model (Proc Mixed)	SAS 9.4
Plasma cytokine concentrations (ELISA)	3.2 (supplemental Fig 4)	Unpaired t test	GraphPad Prism (9.0.0)
Brain immunophenotyping (Flow cytometery)	3.2 (Fig 2; supplemental Fig 5)	Mixed Model (Proc Mixed)	SAS 9.4
Microglial morphology	3.3 (Fig 3; supplemental Fig 6)	Mixed Model (Proc Mixed)	SAS 9.4
Hippocampal cGAS/STING protein concentrations	3.4 (Fig 4; supplemental Fig S7)	Unpaired t test	GraphPad Prism (9.0.0)
Neuronal (HHi) and microglial (SV40) cytosolic DNA concentrations	3.4 (Fig 5)	Unpaired t test	GraphPad Prism (9.0.0)
Neuronal (HHi) and microglial (SV40) cGAS/STING protein concentrations	3.4 (Fig 6; supplemental Fig 8)	One way ANOVA	GraphPad Prism (9.0.0)
Neuronal (HHi) and microglial (SV40) co-culture cGAS/STING protein concentrations +/ gap junction inhibitor	3.4 (Fig 7; supplemental Fig 9	One way ANOVA	GraphPad Prism (9.0.0)
